# Supplementary material for: Adherence to a cholesterol-lowering diet and the risk of prostate cancer
Source: Royal Society of Chemistry journal article supplement (doi:10.1039/d1fo03795a), 2022-01-01
Supplement: d1fo03795a1.pdf [file d1fo03795a1.pdf]

**Supplementary Table 1.** Optimal cut-off from receiving operating characteristic (ROC) analysis for each dietary indicator of cholesterol lowering-diet score. Italy, 1991-2002.

| <b>Dietary indicator</b>                                                               | <b>Optimal cut-off</b>             | <b>Literature-based cut-off</b>          |
|----------------------------------------------------------------------------------------|------------------------------------|------------------------------------------|
| <b>Non-cellulosic polysaccharides soluble fibres</b><br>(as a proxy of viscose fibres) | $\geq 6.9$ g/day                   | $\geq 3.0$ g/day <sup>b</sup>            |
| <b>Monounsaturated fatty acids (MUFA)</b><br>(% of total energy intake)                | $\geq 12.9\%$                      | $\geq 20.0\%$                            |
| <b>Legumes</b> (servings/weeks)                                                        | $\geq 0.5$                         | $\geq 0.5$                               |
| <b>Saturated fatty acids (SFA)</b><br>(% of total energy intake)                       | $< 8.5\%$                          | $< 7.0\%$                                |
| <b>Seeds or corn oil</b> (as a proxy of phytosterol)                                   | $\geq 2.25$ g/day<br>per 1000 kcal | 45.0 g/day<br>per 1000 kcal <sup>c</sup> |
| <b>Dietary cholesterol</b>                                                             | $< 267.4$ mg/day                   | 200.0 mg/day                             |
| <b>Glycaemic index<sup>a</sup></b>                                                     | $< 77.9$                           | 75.0                                     |

<sup>a</sup>On white bread scale. <sup>b</sup>Recommended intake for viscose fibres. <sup>c</sup>Recommended intake for phytosterols.

**Supplementary Table 2.** Odds ratios (ORs)<sup>a</sup> and corresponding 95% confidence intervals (CIs) for prostate cancer (PCa) risk according to interaction between cholesterol-lowering diet score and selected covariates. Italy, 1991-2002.

| Variable          | Cholesterol-lowering diet score |                       |                       | p-value <sup>b</sup> |
|-------------------|---------------------------------|-----------------------|-----------------------|----------------------|
|                   | 0 to 2<br>OR (95% CI)           | 3 to 4<br>OR (95% CI) | 5 to 7<br>OR (95% CI) |                      |
| Geographic area   |                                 |                       |                       |                      |
| North             | Ref.                            | 0.70 (0.53-0.91)      | 0.57 (0.41-0.78)      | p=0.81               |
| Centre/South      | 1.03 (0.56-1.89)                | 0.62 (0.44-0.88)      | 0.60 (0.36-0.98)      |                      |
| Age (years)       |                                 |                       |                       |                      |
| <65               | 0.45 (0.29-0.70)                | 0.34 (0.24-0.47)      | 0.33 (0.22-0.49)      | p=0.36               |
| ≥65               | Ref.                            | 0.62 (0.44-0.86)      | 0.48 (0.32-0.70)      |                      |
| Education (years) |                                 |                       |                       |                      |
| <7                | Ref.                            | 0.57 (0.41-0.78)      | 0.41 (0.28-0.61)      | p=0.15               |
| 7 to 11           | 1.03 (0.61-1.73)                | 0.80 (0.56-1.14)      | 0.78 (0.50-1.23)      |                      |
| ≥12               | 1.21 (0.65-2.27)                | 1.16 (0.78-1.72)      | 1.37 (0.75-2.52)      |                      |
| Abdominal obesity |                                 |                       |                       |                      |
| No                | 1.07 (0.69-1.67)                | 0.71 (0.49-1.03)      | 0.63 (0.41-0.98)      | p=0.88               |
| Yes               | Ref.                            | 0.70 (0.48-1.02)      | 0.56 (0.36-0.86)      |                      |
| Physical activity |                                 |                       |                       |                      |
| Low/medium        | Ref.                            | 0.61 (0.46-0.80)      | 0.50 (0.36-0.69)      | p=0.17               |
| High              | 0.66 (0.38-1.14)                | 0.68 (0.47-0.96)      | 0.63 (0.38-1.05)      |                      |
| Diabetes mellitus |                                 |                       |                       |                      |
| No                | 0.75 (0.29-1.86)                | 0.52 (0.21-1.25)      | 0.44 (0.17-1.09)      | p=0.76               |
| Yes               | Ref.                            | 0.54 (0.19-1.44)      | 0.39 (0.13-1.12)      |                      |
| Smoking habit     |                                 |                       |                       |                      |
| Never             | 1.93 (1.08-3.48)                | 1.25 (0.79-1.99)      | 1.10 (0.63-1.92)      | p=0.89               |
| Former            | 1.38 (0.82-2.35)                | 0.99 (0.64-1.23)      | 1.93 (1.08-3.48)      |                      |
| Current           | Ref.                            | 0.65 (0.40-1.04)      | 0.65 (0.37-1.16)      |                      |
| Alcohol habit     |                                 |                       |                       |                      |
| Never/Former      | 1.43 (0.74-2.79)                | 0.66 (0.45-0.96)      | 0.82 (0.46-1.45)      | p=0.26               |
| Current           | Ref.                            | 0.72 (0.56-0.94)      | 0.58 (0.42-0.79)      |                      |

<sup>a</sup>Estimated by means unconditional logistic regression model included also terms for study centre, age, education, abdominal obesity, physical activity, diabetes mellitus, family history of prostate cancer, smoking habit, alcohol habit, and energy intake (when appropriate).

<sup>b</sup>Estimated through log-likelihood ratio test between the models with and without interaction term.
